# Supplementary material for: Thermal pressing of a metal-grid transparent electrode into a plastic substrate for flexible electronic devices
Source: Royal Society of Chemistry journal article supplement (doi:10.1039/c6tc01234e), 2016-01-01
Supplement: c6tc01234e1.pdf [file c6tc01234e1.pdf]

## Supporting Information

**Title:** Thermal pressing of a metal-grid transparent electrode into a plastic substrate for flexible electronic devices

Youngwoo Lee, Won-Yong Jin, Jae-Wook Kang\*, Jihoon Kim\*

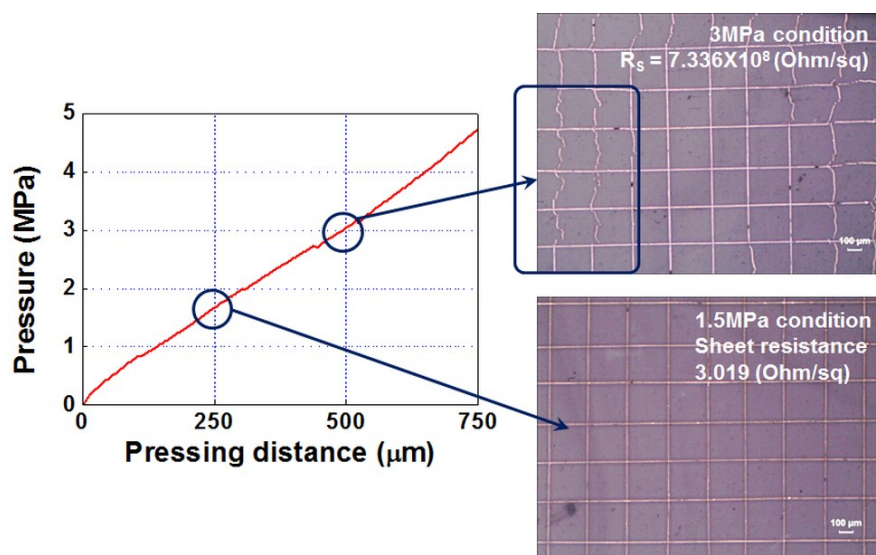

**Figure S1.** The exerted pressure was determined by monitoring the quality of the MGETE lines after thermal pressing.

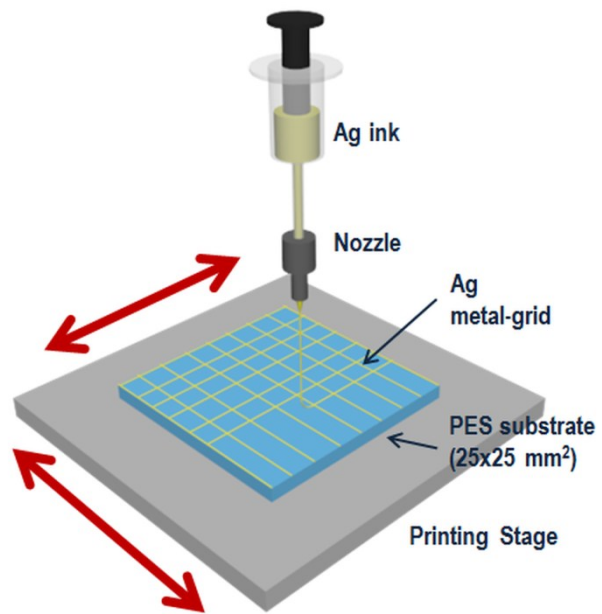

**Figure S2.** Schematic diagram of the EHD continuous jet printing process for the fabrication of a metal-grid transparent electrode
